# Supplementary material for: Engineered human antibodies for the opsonization and killing of Staphylococcus aureus
Source: PubMed Central journal article supplement — Proc Natl Acad Sci U S A. 2022 Jan 20;119(4):e2114478119. doi: 10.1073/pnas.2114478119 (PMC8795526; doi:10.1073/pnas.2114478119), 2022-01-20
Supplement: pnas.2114478119.sapp.pdf [file pnas.2114478119.sapp.pdf]

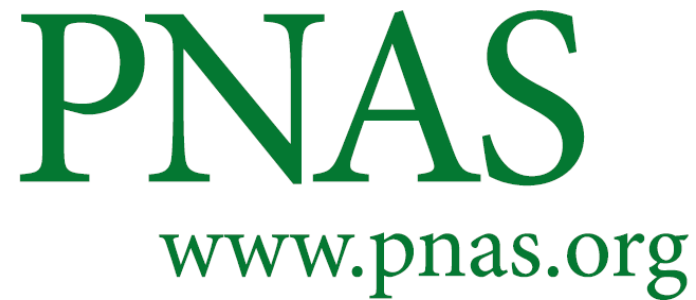

**Supplementary Information for**

**Engineered human antibodies for the opsonization and killing of  
*Staphylococcus aureus***

Xinhai Chen<sup>1,2</sup>, Olaf Schneewind<sup>†</sup>, Dominique Missiakas<sup>1,2\*</sup>

Corresponding author: Dominique Missiakas  
Email: [dmissiak@bsd.uchicago.edu](mailto:dmissiak@bsd.uchicago.edu)

**This PDF file includes:**

Figures S1 to S6  
Tables S1 to S3

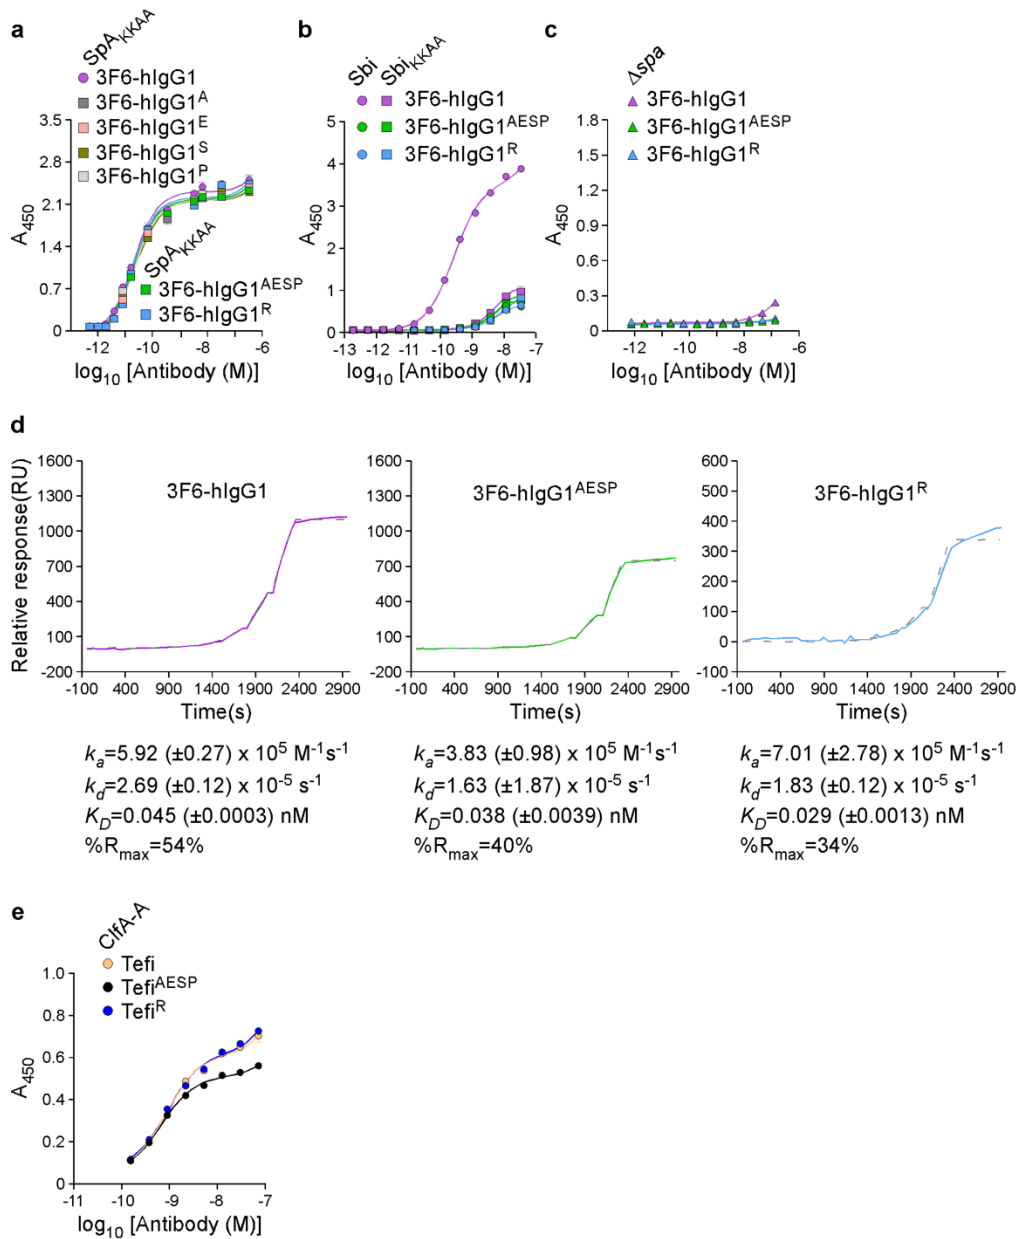

**Fig. S1. Binding of staphylococcal antigens to cognate antibodies or their variants.**

Antibody interactions were measured by ELISA (**a-c, e**;  $n = 3$  assays) and by surface plasmon resonance (SPR, Biacore 8K) (**d**;  $n = 2$  assays). ELISA plates were coated with recombinant histidine tagged SpA<sub>KKAA</sub> (**a**), Sbi/Sbi<sub>KKAA</sub> proteins (**b**),  $\Delta spa$  bacteria (**c**), recombinant histidine tagged ClfA-A domain (**e**). Bound antibodies were detected with HRP-conjugated secondary antibody and absorbances were recorded at 450 nm (A<sub>450</sub>). **d**, SPR was used to determine the affinity of 3F6-hIgG1, 3F6-hIgG1<sup>AESP</sup>, and 3F6-hIgG1<sup>R</sup> to recombinant SpA<sub>KKAA</sub>. Antigen (SpA<sub>KKAA</sub>) was immobilized on NTA sensor chip. Eight concentrations (10, 3.3, 1.11, 0.37, 0.123, 0.041, 0.014, and 0.0046 nM) of each antibody were used to measure binding. Colored solid lines represent the acquired data and gray dotted lines which mostly overlap are fitting curves obtained with single-cycle

kinetics. Data are presented as mean  $\pm$  s.e.m and are representative of two independent experiments.

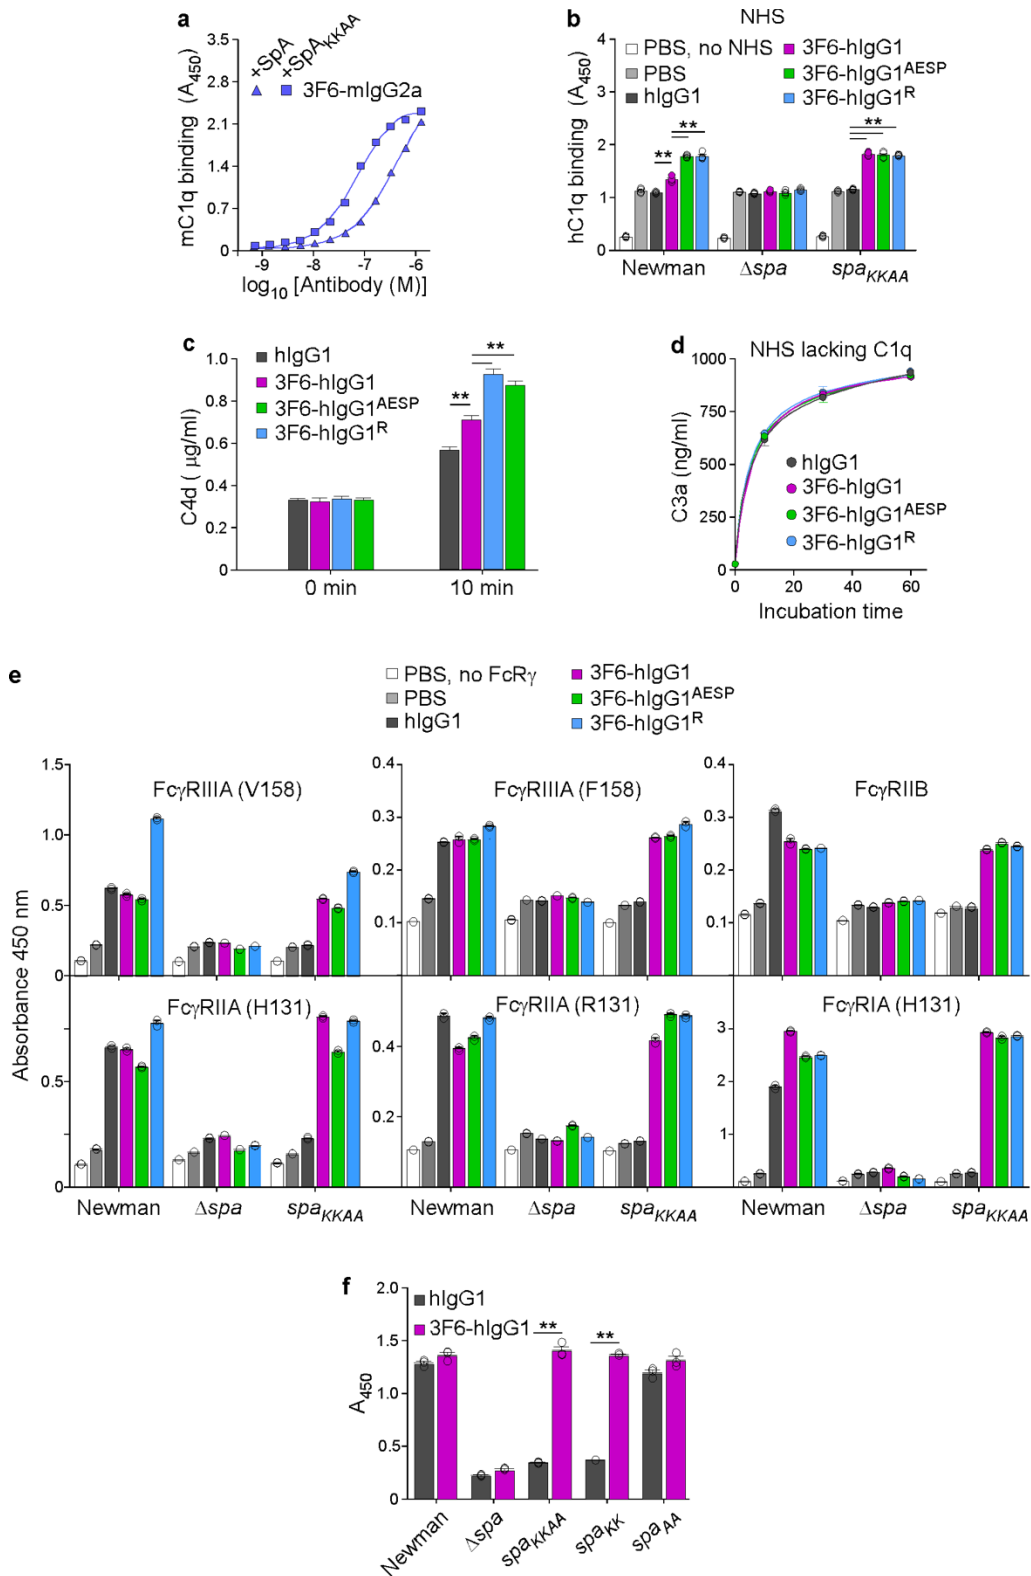

**Fig. S2. SpA interaction with Fc blocks C1q but not Fc $\gamma$ R binding.** a, ELISA binding curves for (mouse) mC1q to 3F6-mIgG2a were assessed in the presence of SpA or

SpA<sub>KKAA</sub> ( $n = 3$  assays). **b**, hC1q binding to test antibody was assessed in the presence of bacteria: wild type Newman or its variants,  $\Delta spa$  or  $spa_{KKAA}$ . ELISA plates were coated with bacteria. NHS was used as the source of hC1q. **c**, Quantification of C4d production following incubation with *S. aureus* Newman ( $1 \times 10^8$  CFU/ml) for 0 and 10 min in the presence of test antibodies and 10% NHS. **d**, Quantification of C3a production over time following incubation of bacteria (Newman  $1 \times 10^8$  CFU/ml) with test antibodies and 10% NHS lacking hC1q. Data are presented as mean  $\pm$  s.e.m ( $n = 3$  assays). **e**, Binding of purified hFc $\gamma$ R to the surface of Newman or its variants,  $\Delta spa$  or  $spa_{KKAA}$ , in the presence of test antibodies or PBS and hIgG1 controls ( $n = 3$  assays). Color code for test antibodies is shown in the last panel. **f**, Antibody binding to Newman or its variants ( $\Delta spa$ ,  $spa_{KKAA}$ ,  $spa_{KK}$ , or  $spa_{AA}$ ) ( $n = 3$  assays). Data are presented as mean  $\pm$  s.e.m. Significant differences were identified in (**b**) by two-way ANOVA with Bonferroni post-tests (\*\* $P < 0.01$ ; \* $P < 0.05$ ) and in (**c**, **f**) by two-tailed Student's *t*-test (\*\* $P < 0.01$ ; \* $P < 0.05$ ). One representative of two independent experiments is shown.

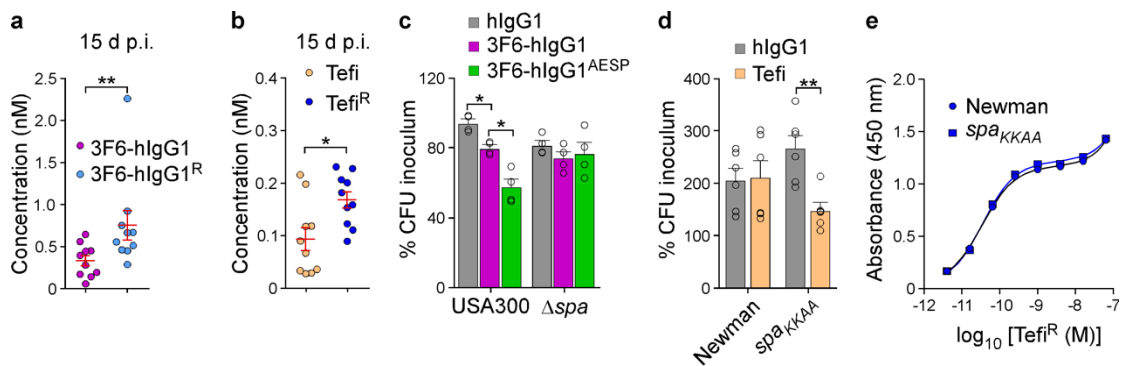

**Fig. S3. Biological properties of anti-staphylococcal antibodies with Fc substitutions.** **a-b**, Serum concentration of 3F6-hIgG1 and 3F6-hIgG1<sup>R</sup> (**a**), and of Tefi and Tefi<sup>R</sup> (**b**), in BALB/c mice 15 days post infection (p. i.). Animals were the same as in Fig. 2a-d. **c-e**, OPK activity of test antibodies toward *S. aureus* USA300 or its  $\Delta spa$  variants ( $n = 4$  donors) (**c**) and toward Newman and its  $spa_{KKAA}$  variant ( $n = 6$  donors) in human blood (**d**). **e**, Tefi<sup>R</sup> binding to Newman or  $spa_{KKAA}$  bacteria ( $n = 3$  assays). ELISA plates were coated with bacteria. Data are presented as mean  $\pm$  s.e.m. and differences identified with the two-tailed Student's *t* test (**a-b**) or two-way ANOVA with Bonferroni post-tests (**c-d**) (\*\* $P < 0.01$ ; \* $P < 0.05$ ).

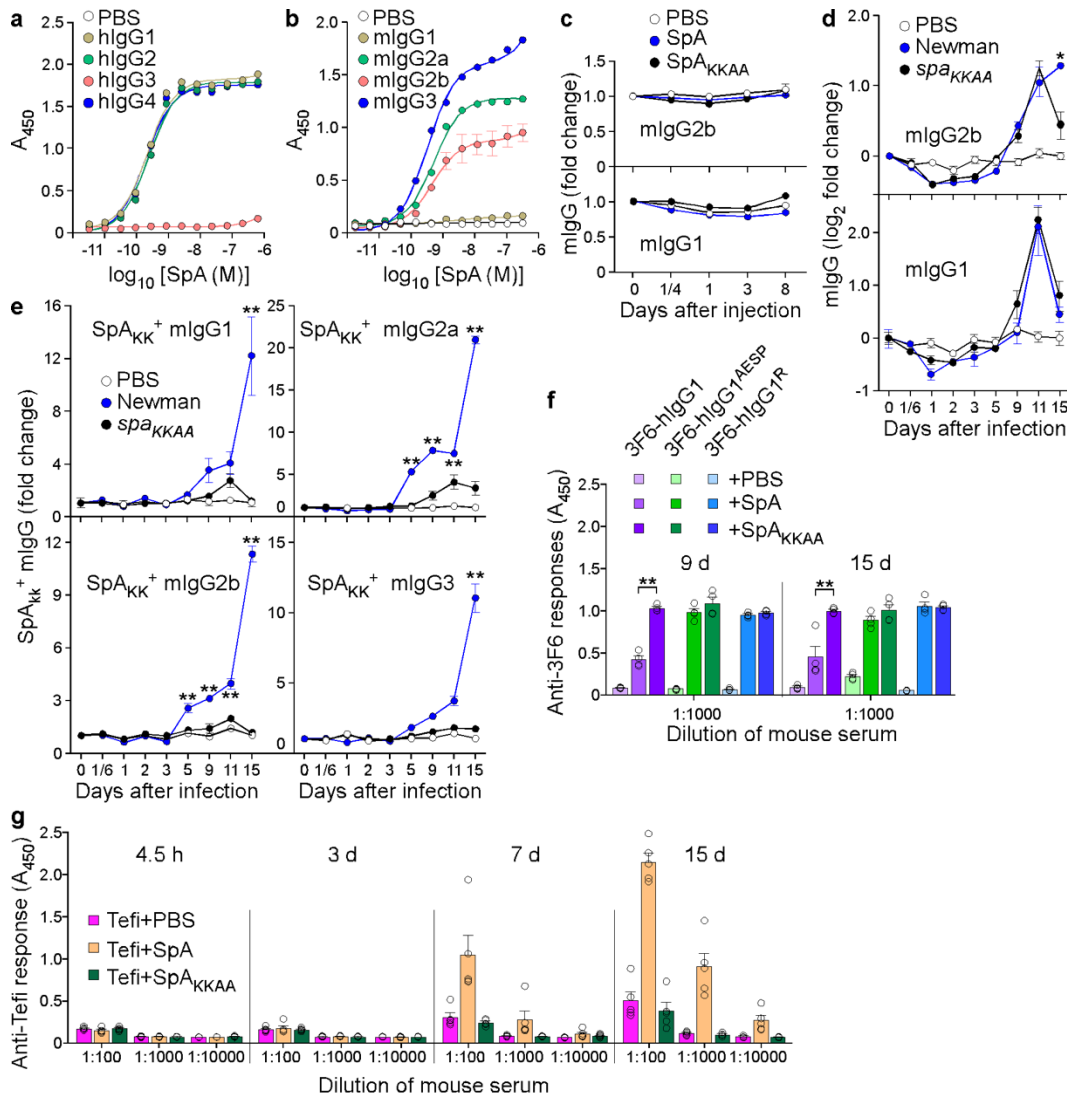

**Fig. S4. Impact of SpA interactions with antibodies and immune complexes.** **a-b**, ELISA binding curves for the indicated human (**a**) and mouse (**b**) IgG to SpA ( $n = 3$  assays). ELISA plates were coated with IgG or mock (PBS). **c-d**, Fold change over time of the serum concentration of mIgG1 and mIgG2b following injection of PBS, SpA or SpA<sub>KKAA</sub> (**c**), and of PBS, Newman or its *spa*<sub>KKAA</sub> variant in BALB/c mice (**d**) ( $n = 4$  animals per group). **e**, Fold change over time of the serum concentration of V<sub>H</sub>3-clonal mIgG from mice infected with mock (PBS), Newman or its *spa*<sub>KKAA</sub> variant. Sera were from animals shown in panel d and Fig. 4d. **f**, Antibody responses against antibodies 3F6-hIgG1, 3F6-hIgG1<sup>R</sup>, and 3F6-hIgG1<sup>AESP</sup> following injection in BALB/c mice ( $n = 4$  animals per group) in the presence of SpA, SpA<sub>KKAA</sub>, or PBS control. Sera were obtained from animals shown in Fig. 4f on days 9 and 15. **g**, Antibody responses against Tefi following injection in BALB/c mice ( $n = 4$  animals per group) in the presence of SpA, SpA<sub>KKAA</sub>, or PBS control. Sera were obtained from animals shown in Fig. 4g at the indicated times. Significant differences were identified in (**d**, **e**) by two-way ANOVA with Bonferroni post-tests and in **f** by one-way ANOVA with Tukey's multiple-comparison test (\*\* $P < 0.01$ ; \* $P < 0.05$ ).

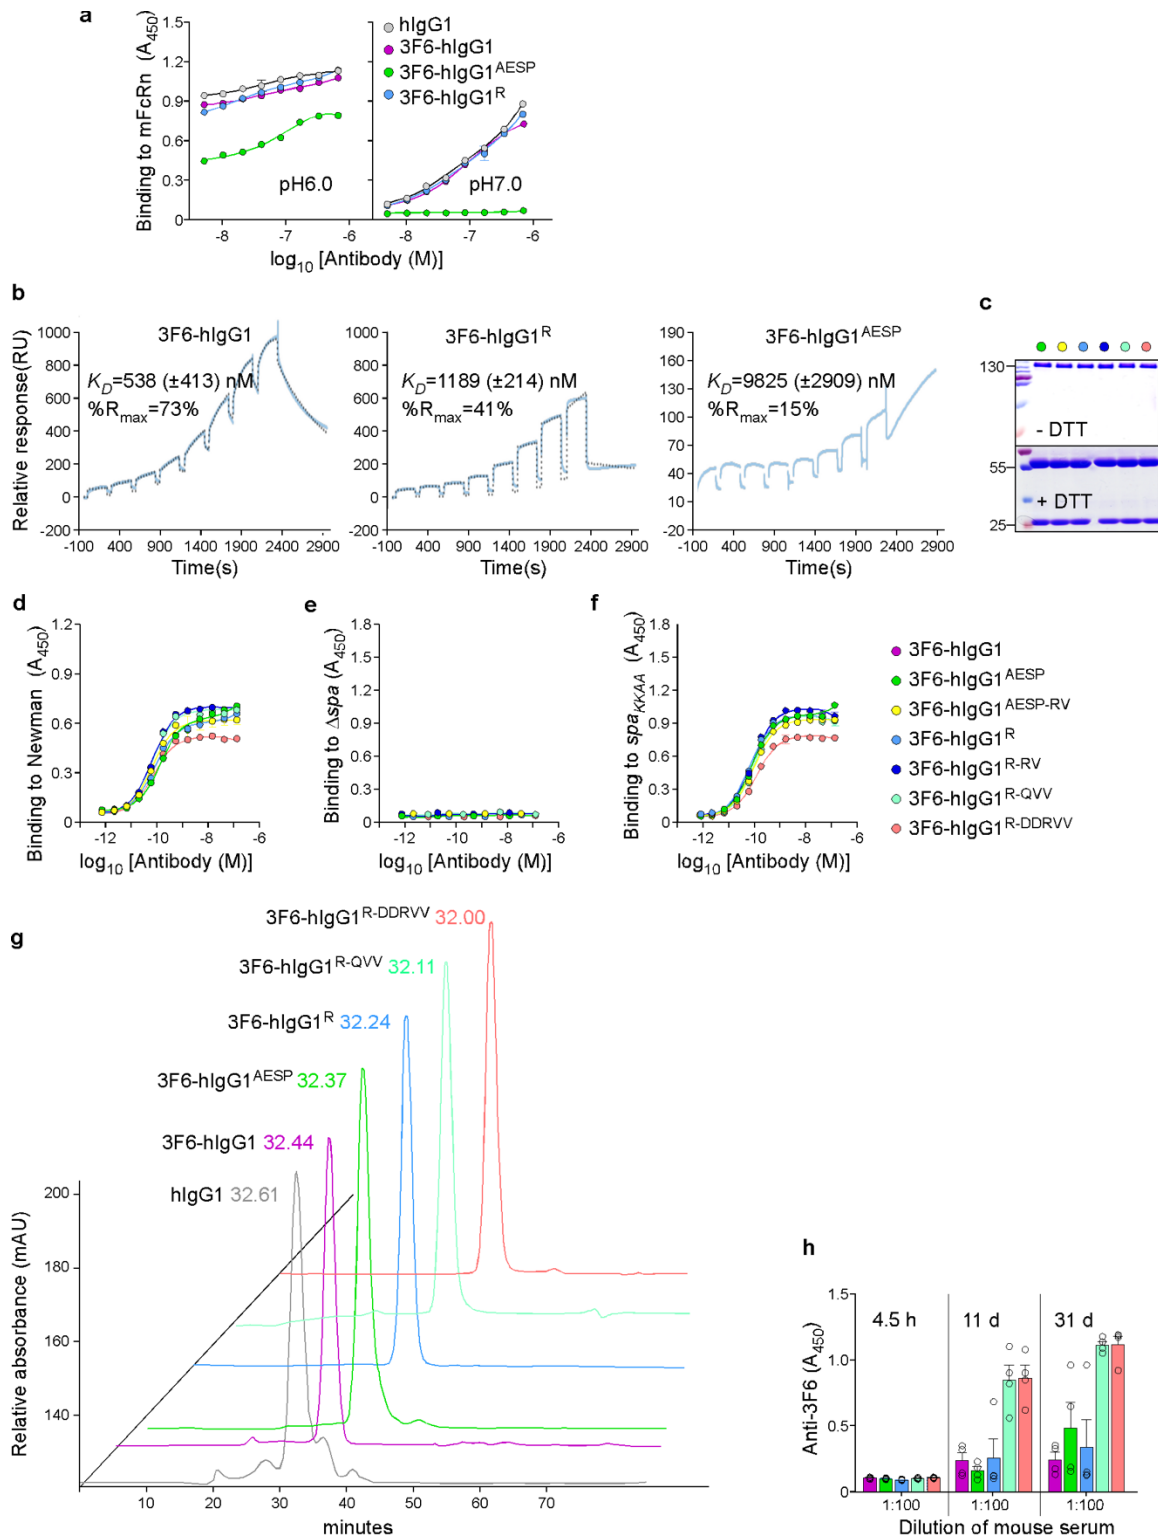

**Fig. S5. Effect of 3F6 amino acid substitutions on FcRn and antigen binding and on immunogenicity.** **a**, ELISA binding curves for mFcRn to antibodies were obtained at pH6.0 and pH7.0 ( $n = 3$  assays). ELISA plates were coated with serially diluted test



antibodies. **b**, SPR binding curves of 3F6-hIgG1, 3F6-hIgG1<sup>AESP</sup>, and 3F6-hIgG1<sup>R</sup> at pH 6.0 to human FcRn (hFcRn) immobilized on NTA sensor chip. Eight concentrations (2500, 1250, 625, 312.5, 156.3, 78.1, 39.1, and 19.5 nM) of each antibody were used. Light blue lines represent experimental binding curves and gray dotted lines are calculated fit using single-cycle kinetics. **c**, Coomassie-stained gel following SDS-PAGE separation of 3F6-hIgG1 variants in the absence (-) or presence (+) of the reducing agent dithiothreitol (DTT). **d-f**, ELISA binding curves ( $n = 3$  assays) for antibody variants to Newman (**d**),  $\Delta spa$  (**e**), and  $spa_{KKAA}$  (**f**) bacteria. ELISA plates were coated with bacteria. **g**, Size exclusion chromatography of purified hIgG1, 3F6-hIgG1, and 3F6-hIgG1 variants. **h**, Antibody responses against test antibodies following injection in BALB/c mice ( $n = 4$  animals per group). Sera were obtained at indicated times from animals shown in Fig. 5e. Data are presented as mean  $\pm$  s.e.m and representative of two independent experiments (**c-e**).

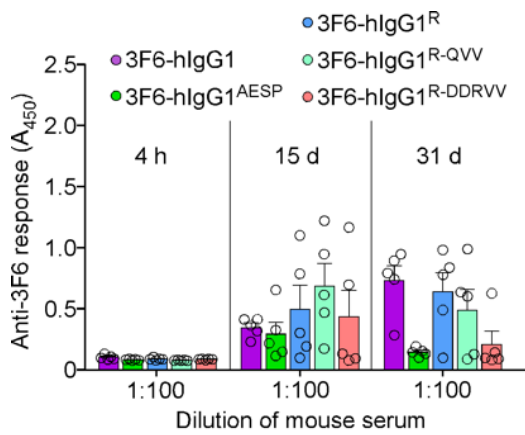

**Fig. S6.** Antibody responses against test antibodies following injection in Tg32 mice. Sera were obtained at indicated times from animals shown in Fig. 6c. Data are presented as mean  $\pm$  s.e.m. No statistical difference could be found between the data.

**Table S1. Half maximal effective concentration (EC<sub>50</sub>) values for all binding experiments using ELISA**

|                           |                      | Test antibodies    |                           |                        |             |                     |              |                      |                   |                            |                              |
|---------------------------|----------------------|--------------------|---------------------------|------------------------|-------------|---------------------|--------------|----------------------|-------------------|----------------------------|------------------------------|
| Ligand                    | EC <sub>50</sub> (M) | 3F6-hlgG1          | 3F6-hlgG1 <sup>AESP</sup> | 3F6-hlgG1 <sup>R</sup> | SpA         | SpA <sup>KKAA</sup> | Tefi         | Tefi <sup>AESP</sup> | Tefi <sup>R</sup> | 3F6-hlgG1 <sup>R-QVV</sup> | 3F6-hlgG1 <sup>R-DDRVV</sup> |
| SpA                       | 10 <sup>-11</sup>    | 36.16 ± 2.22       | 4.77 ± 0.49               | 4.90 ± 0.49            | --          | --                  | 26.2 ± 1.77  | <                    | <                 | --                         | --                           |
| SpA <sup>KKAA</sup>       | 10 <sup>-11</sup>    | 8.80 ± 0.59        | 5.05 ± 0.34               | 4.82 ± 0.39            | --          | --                  | --           | --                   | --                | --                         | --                           |
| Newman                    | 10 <sup>-10</sup>    | 5.58 ± 0.64        | 1.67 ± 0.17               | 1.81 ± 0.19            | --          | --                  | --           | --                   | 0.35 ± 0.027      | 0.69 ± 0.091               | 0.75 ± 0.097                 |
| Δspa                      | 10 <sup>-10</sup>    | <                  | <                         | <                      | --          | --                  | --           | --                   | --                | <                          | <                            |
| spa <sup>KKAA</sup>       | 10 <sup>-10</sup>    | 1.01 ± 0.03        | 1.08 ± 0.05               | 1.07 ± 0.06            | --          | --                  | --           | --                   | 0.36 ± 0.032      | 0.99 ± 0.12                | 1.22 ± 0.13                  |
| 3F6-hlgG1                 | 10 <sup>-11</sup>    | --                 | --                        | --                     | 49.7 ± 6.67 | 10.1 ± 1.16         | --           | --                   | --                | --                         | --                           |
| 3F6-hlgG1 <sup>AESP</sup> | 10 <sup>-11</sup>    | --                 | --                        | --                     | 35.5 ± 4.80 | 11.1 ± 1.08         | --           | --                   | --                | --                         | --                           |
| 3F6-hlgG1 <sup>R</sup>    | 10 <sup>-11</sup>    | --                 | --                        | --                     | 31.1 ± 4.42 | 10.8 ± 1.24         | --           | --                   | --                | --                         | --                           |
| Sbi                       | 10 <sup>-10</sup>    | 2.72 ± 0.14        | <                         | <                      | --          | --                  | 1.08 ± 0.07  | --                   | <                 | --                         | --                           |
| Sbi <sup>KKAA</sup>       | 10 <sup>-10</sup>    | <                  | <                         | <                      | --          | --                  | <            | --                   | <                 | --                         | --                           |
| CifA-A                    | 10 <sup>-10</sup>    | --                 | --                        | --                     | --          | --                  | 2.61 ± 0.31  | 1.93 ± 0.23          | 2.83 ± 0.35       | --                         | --                           |
| hc1q                      | 10 <sup>-7</sup>     | 2.50 ± 0.42        | 1.23 ± 0.16               | 1.11 ± 0.11            | --          | --                  | 0.38 ± 0.027 | 0.80 ± 0.041         | 0.56 ± 0.072      | --                         | --                           |
| hFcRn pH6.0               | 10 <sup>-8</sup>     | 27.3 ± 1.07        | <                         | <                      | --          | --                  | 0.63 ± 0.033 | 4.18 ± 0.56          | 0.67 ± 0.033      | >                          | >                            |
| hFcRn pH7.0               | 10 <sup>-8</sup>     | <                  | <                         | <                      | --          | --                  | --           | --                   | --                | <                          | <                            |
| mFcRn pH6.0               | 10 <sup>-8</sup>     | >                  | >                         | >                      | --          | --                  | --           | --                   | --                | >                          | >                            |
| mFcRn pH7.0               | 10 <sup>-8</sup>     | 9.44 ± 1.93        | <                         | 4.78 ± 2.13            | --          | --                  | --           | --                   | --                | >                          | >                            |
|                           |                      | Control antibodies |                           |                        |             |                     |              |                      |                   |                            |                              |
| Ligand                    | EC <sub>50</sub> (M) | hlgG1              | hlgG2                     | hlgG3                  | hlgG4       | mIgG1               | mIgG2a       | mIgG2b               | mIgG3             |                            |                              |
| SpA                       | 10 <sup>-11</sup>    | 19.9 ± 2.30        | 23.9 ± 2.29               | <                      | 19.6 ± 2.05 | <                   | 49.5 ± 4.93  | 49.7 ± 5.44          | 33.2 ± 3.27       |                            |                              |
| hFcRn pH6.0               | 10 <sup>-8</sup>     | 8.74 ± 1.15        | 1.30 ± 0.06               | --                     | 1.27 ± 0.11 | --                  | --           | --                   | --                |                            |                              |
| hFcRn pH7.0               | 10 <sup>-8</sup>     | --                 | --                        | --                     | --          | --                  | --           | --                   | --                |                            |                              |
| mFcRn pH6.0               | 10 <sup>-8</sup>     | --                 | --                        | --                     | --          | --                  | 3.38 ± 0.13  | 4.06 ± 0.68          | 3.80 ± 0.23       |                            |                              |
| mFcRn pH7.0               | 10 <sup>-8</sup>     | --                 | --                        | --                     | --          | --                  | --           | --                   | --                |                            |                              |

Symbols were as follows: -- binding was not measured; < binding was too low to determine EC<sub>50</sub> value; > binding was too high to determine EC<sub>50</sub> value.

**Table S2. EC<sub>50</sub> between test antibodies and ligands (C1q/FcRn) in the presence of SpA competitor**

| Binding pair                        | EC <sub>50</sub> (M) | Competitor   |                     |
|-------------------------------------|----------------------|--------------|---------------------|
|                                     |                      | SpA          | SpA <sub>KKAA</sub> |
| 3F6 hlgG1 & hc1q                    | 10 <sup>-7</sup>     | 29.2 ± 45.1  | 1.27 ± 0.081        |
| 3F6-hlgG1 <sup>AESP</sup> & hc1q    | 10 <sup>-7</sup>     | 0.20 ± 0.022 | 0.30 ± 0.35         |
| 3F6-hlgG1 <sup>R</sup> & hc1q       | 10 <sup>-7</sup>     | 0.18 ± 0.022 | 0.27 ± 0.029        |
| 3F6-hlgG1 <sup>R-QVV</sup> & hc1q   | 10 <sup>-7</sup>     | 0.27 ± 0.036 | 0.29 ± 0.036        |
| 3F6-hlgG1 <sup>R-DDRVV</sup> & hc1q | 10 <sup>-7</sup>     | 0.57 ± 0.010 | 0.65 ± 0.015        |
| Tefi & hc1q                         | 10 <sup>-7</sup>     | 1.21 ± 0.14  | 0.39 ± 0.018        |
| Tefi <sup>AESP</sup> & hc1q         | 10 <sup>-7</sup>     | 0.75 ± 0.048 | 0.84 ± 0.053        |
| Tefi <sup>R</sup> & hc1q            | 10 <sup>-7</sup>     | 0.47 ± 0.050 | 0.46 ± 0.055        |
| 3F6-mlgG2a & mc1q                   | 10 <sup>-7</sup>     | 4.22 ± 0.72  | 0.82 ± 0.096        |
| hlG1 & hFcRn pH6.0                  | 10 <sup>-8</sup>     | <            | 5.94 ± 1.03         |
| hlG2 & hFcRn pH6.0                  | 10 <sup>-8</sup>     | <            | 1.57 ± 0.17         |
| hlG4 & hFcRn pH6.0                  | 10 <sup>-8</sup>     | <            | 1.08 ± 0.18         |
| Tefi & hFcRn pH6.0                  | 10 <sup>-8</sup>     | 4.98 ± 0.21  | 0.63 ± 0.039        |
| mlgG2a & mFcRn pH6.0                | 10 <sup>-8</sup>     | <            | <                   |
| mlgG2b & mFcRn pH6.0                | 10 <sup>-8</sup>     | <            | <                   |
| mlgG3 & mFcRn pH6.0                 | 10 <sup>-8</sup>     | <            | <                   |

The symbol "<" indicates that interactions between antigen and ligand (binding pairs) were inhibited even at the lowest concentration of competitor.

**Table S3. Non-compartmental pharmacokinetic (PK) parameters for test antibodies in mice.**

| <b>BALB/c mice - PK parameters<sup>1</sup></b>   |                            |                             |                                   |                                 |
|--------------------------------------------------|----------------------------|-----------------------------|-----------------------------------|---------------------------------|
| <b>Antibody</b>                                  | <b>t<sub>1/2</sub> (d)</b> | <b>C<sub>max</sub> (nM)</b> | <b>AUC<sub>0-inf</sub> (nM*d)</b> | <b>Clearance ((mg/kg)/nM/d)</b> |
| 3F6-hIgG1                                        | 10.1                       | 923.9                       | 12848.5                           | 0.00039                         |
| 3F6-hIgG1 <sup>R</sup>                           | 8.3                        | 1152.4                      | 23156.3                           | 0.00022                         |
| 3F6-hIgG1 <sup>AESP</sup>                        | 8.6                        | 786.8                       | 10775.8                           | 0.00046                         |
| 3F6-hIgG1 <sup>R-QVV</sup>                       | 3.1                        | 710.8                       | 3753.6                            | 0.00133                         |
| 3F6-hIgG1 <sup>R-DDRVV</sup>                     | 2.3                        | 948.8                       | 5004.45                           | 0.00099                         |
| <b>Tg32 mice - PK parameters</b>                 |                            |                             |                                   |                                 |
| <b>Antibody</b>                                  | <b>t<sub>1/2</sub> (d)</b> | <b>C<sub>max</sub> (nM)</b> | <b>AUC<sub>0-inf</sub> (nM*d)</b> | <b>Clearance ((mg/kg)/nM/d)</b> |
| 3F6-hIgG1                                        | 8.7                        | 693.5                       | 6737.8                            | 0.00074                         |
| 3F6-hIgG1 <sup>R</sup>                           | 10.0                       | 535.2                       | 7235.9                            | 0.00069                         |
| 3F6-hIgG1 <sup>AESP</sup>                        | 1.4                        | 641.7                       | 1171.9                            | 0.00427                         |
| 3F6-hIgG1 <sup>R-QVV</sup>                       | 10.5                       | 525.2                       | 8401.8                            | 0.00060                         |
| 3F6-hIgG1 <sup>R-DDRVV</sup>                     | 7.9                        | 575.4                       | 5964.5                            | 0.00084                         |
| <b>Tg32 pretreated with hIgG - PK parameters</b> |                            |                             |                                   |                                 |
| <b>Antibody</b>                                  | <b>t<sub>1/2</sub> (d)</b> | <b>C<sub>max</sub> (nM)</b> | <b>AUC<sub>0-inf</sub> (nM*d)</b> | <b>Clearance ((mg/kg)/nM/d)</b> |
| 3F6-hIgG1                                        | 12.0                       | 302.8                       | 6524.6                            | 0.00077                         |
| 3F6-hIgG1 <sup>R</sup>                           | 15.2                       | 278.2                       | 7765.4                            | 0.00064                         |
| 3F6-hIgG1 <sup>AESP</sup>                        | not determined             | not determined              | not determined                    | not determined                  |
| 3F6-hIgG1 <sup>R-QVV</sup>                       | 20.0                       | 323.4                       | 12319.6                           | 0.00041                         |
| 3F6-hIgG1 <sup>R-DDRVV</sup>                     | 14.6                       | 340.3                       | 7266.8                            | 0.00069                         |

<sup>1</sup>PK parameters: t<sub>1/2</sub>, terminal half-life; C<sub>max</sub>, Maximum concentration; AUC: Area under the concentration-time curve (AUC); Clearance: Systemic clearance.
